# Supplementary material
Source: Springer Nature journal article supplement (https://www.springermedizin.de/resource/supplementary/12936_2011_2011_MOESM2_ESM.pdf/9542188)
Supplement: MOESM2 [file 9542188]

362 pregnant women recruited

56 took no SP

306 took SP

Included in analysis

92 took one dose of SP

100 took two doses

114 took three doses of SP

44 (48%)  
had  
anaemia

48 (52%)  
had normal  
HB

33 (33%)  
had  
anaemia

67 (67%)  
had normal  
HB

42 (37%)  
had  
anaemia

72 (63%)  
had normal  
HB
